# Supplementary material for: Childhood Obesity and Metabolic Imprinting
Source: Oxford University Press journal article supplement (doi:10.2337/dc06-2361), 2007-08-28
Supplement: dc062361onlineappentab3.doc [file dc062361onlineappentab3.doc]

| **Table 3. Prevalence of Childhood Obesity at age 5-7 years, Stratified by Their Mother’s Glycemia while Pregnant with Them, and the Child’s Birthweight*** | | | |
| --- | --- | --- | --- |
|  | **n** | **Child’s Weight > 85th percentile**† | **Child’s Weight > 95th percentile**† |
| **Birthweight <=4000g** |  |  |  |
| Normal GCT | 6695 | 21.4 | 11.0 |
| +GCT, Normal OGTT | 875 | 21.5 | 11.4 |
| +GCT, 1 abn C&C or NDDG | 248 | 26.2 | 14.5 |
| +GCT, GDM-C&C | 148 | 33.1 | 21.0 |
| +GCT,GDM-NDDG; Treated | 314 | 24.8 | 16.6 |
|  |  | p=0.0007 | p<0.001 |
| **Birthweight > 4000g** |  |  |  |
| Normal GCT | 905 | 38.8 | 21.3 |
| +GCT, Normal OGTT | 122 | 35.3 | 23.0 |
| +GCT, 1 abn C&C or NDDG | 40 | 30.0 | 20.0 |
| +GCT, GDM-C&C | 25 | 44.0 | 16.0 |
| +GCT,GDM-NDDG; Treated | 55 | 45.5 | 21.8 |
|  |  | p=0.577 | p=0.767 |

* Stratified analysis is for 9,427 Mother-Child Pairs; birthweight coded missing for 12 children as recorded birthweight out of physiologic range.

†Gender-specific weight-for-age percentiles based on USA norms (1963-1994 Standard).(25); p-values are reported for trend with increasing level of maternal hyperglycemia.

Abbreviations Used: +GCT= 1 hour 50 gram glucose challenge test >7.7 mmol/l (140 mg/dl); OGTT= 100 gram glucose tolerance test; Gestational Diabetes=GDM (2 or more values exceed the threshold by Carpenter and Coustan (C&C) or National Diabetes Data Group (NDDG) criteria(22)
